# Supplementary material
Source: Springer Nature journal article supplement (https://www.springermedizin.de/resource/supplementary/12943_2010_814_MOESM14_ESM.pdf/9554896)

**A**

MCF-7

CD44p

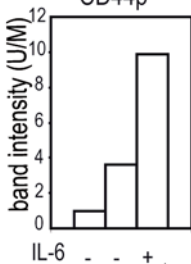

5azadC

171bp---

168bp---

U

M

**B**

MCF-7

CD44p

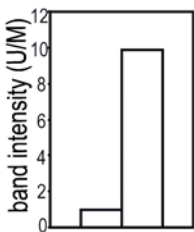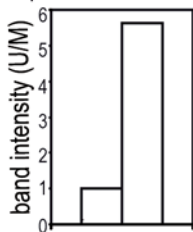

pBabe p53D

scr sip53

171bp---

168bp---

U

M

U

M

**C**

p53D

CD44p

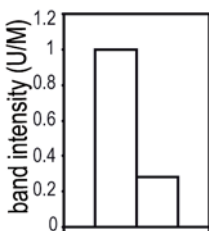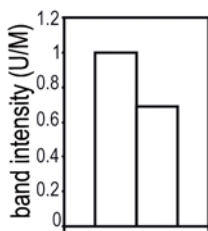 $\alpha$ IL-6 - +

scr silL-6

171bp---

168bp---

U

M

U

M

Supplement: MOESM14 [file 9554896]
